# Supplementary material for: Development of a Novel AAV Gene Therapy Cassette with Improved Safety Features and Efficacy in a Mouse Model of Rett Syndrome
Source: PubMed Central journal article supplement (PMC5423329; doi:10.1016/j.omtm.2017.04.007), 2017-04-22
Supplement: mmc1.pdf [file mmc1.pdf]

**OMTM, Volume 5**

**Supplemental Information**

**Development of a Novel AAV Gene Therapy  
Cassette with Improved Safety Features  
and Efficacy in a Mouse Model of Rett Syndrome**

**Kamal K.E. Gadalla, Thishnapha Vudhironarit, Ralph D. Hector, Sarah Sinnett, Noha G. Bahey, Mark E.S. Bailey, Steven J. Gray, and Stuart R. Cobb**

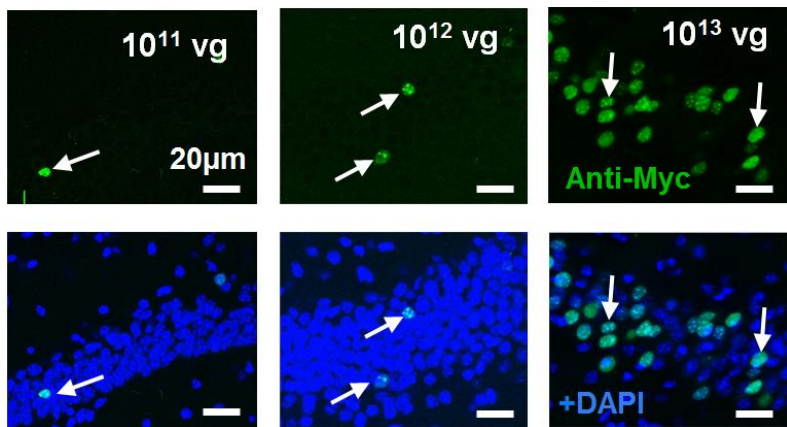

**Figure S1. Expression of vector-derived MeCP2 in the brain after intravenous injection of the 1<sup>st</sup> generation vector.**

Representative confocal micrographs showing transgene expression in the hippocampal CA1 region in *Mecp2*<sup>-y</sup> mice treated intravenously with  $1 \times 10^{11}$ ,  $1 \times 10^{12}$  and  $1 \times 10^{13}$  vg/mouse of the 1<sup>st</sup> generation vector (as revealed by anti-Myc tag immunolabelling). Arrows denote transduced cells and the lower panel shows co-localisation with DAPI. Scale bar = 20 μm

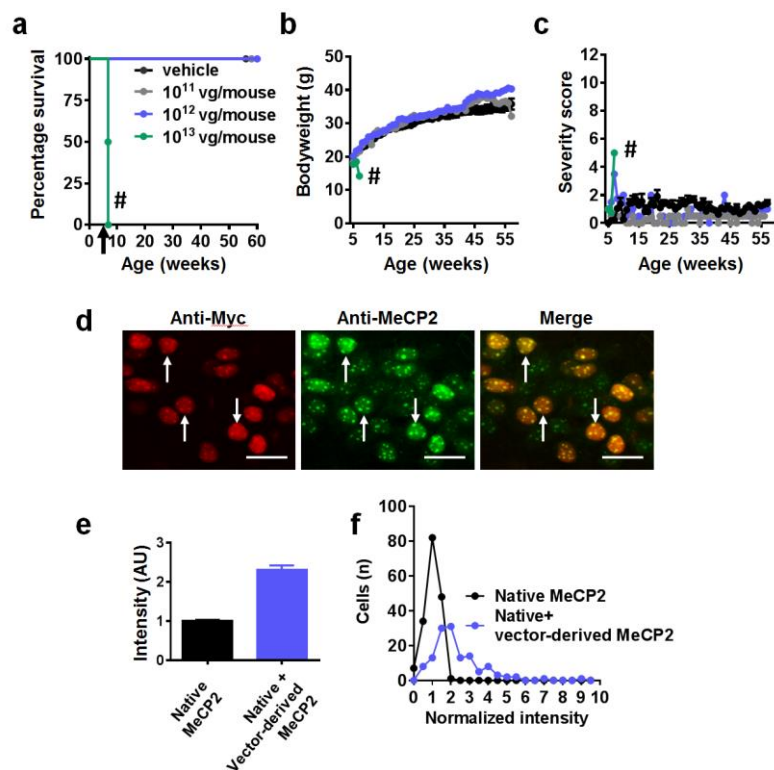

**Figure S2. Systemic delivery of the 1<sup>st</sup> generation vector to wild-type mice is tolerated at low doses but toxic at high doses.**

**(a)** Survival plot showing the early toxicity observed after IV injection of a  $1 \times 10^{13}$  vg/mouse dose of the 1<sup>st</sup> generation vector (green) compared to other doses and vehicle control. Arrow indicates age at injection. **(b-c)** Plots showing mean bodyweight and aggregate severity score, respectively, for these cohorts after injection. Data presented as mean  $\pm$  SEM. **(d)** Flattened confocal stack images of the hippocampus CA1 region of wild-type mice injected with  $1 \times 10^{13}$  vg/mouse of the 1<sup>st</sup> generation vector. Tissues were immunolabelled with anti-Myc and anti-MeCP2 antibodies. White arrows indicate transduced cells. Scale bar indicates 20  $\mu$ m. **(e)** Quantification of cellular levels of native MeCP2 and vector-derived MeCP2 in transduced and non-transduced cells in the hippocampus CA1 region of wild-type mice ( $n=2$  mice; 131 transduced cells and 172 non-transduced cells). Data presented as mean  $\pm$  SEM and normalised to native MeCP2. **(f)** Frequency distribution of normalised MeCP2 level in transduced and non-transduced cells. # indicates lethality at high dose.

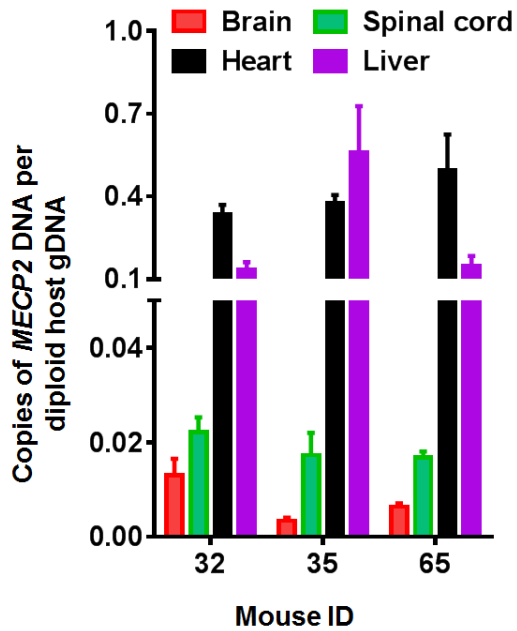

**Figure S3. Biodistribution of 1<sup>st</sup> generation vector after intravenous injection.**

Graph showing vector biodistribution in *Mecp2*<sup>-y</sup> mice (n=3) as calculated by qPCR. Mice were injected intravenously at 5 weeks of age with  $1 \times 10^{12}$  vg/mouse and samples were taken approximately 22 weeks later. Data were standardised to host genomic DNA and are presented as mean  $\pm$  SEM.

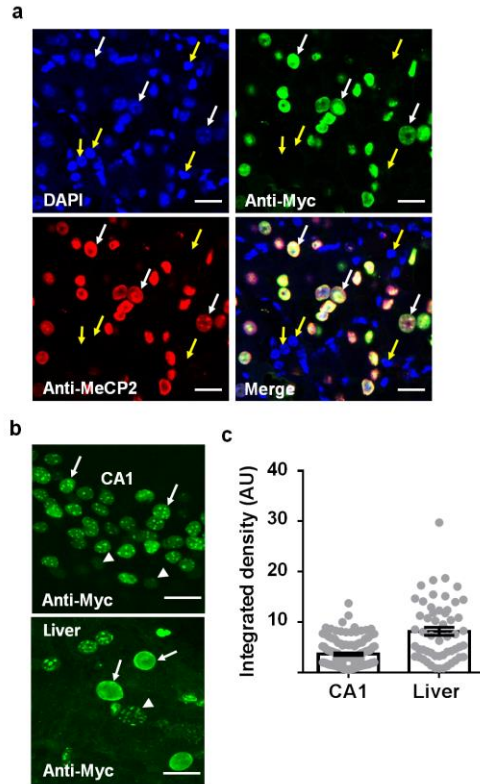

**Figure S4. Intravenous injection of 1<sup>st</sup> generation vector resulted in high level of vector-derived MeCP2 expression in the liver.**

**(a)** Representative confocal images of liver taken from WT mice injected intravenously with 1<sup>st</sup> generation vector at the dose of  $1 \times 10^{13}$  vg/mouse. Sections were immunolabelled with anti-Myc (green), anti-MeCP2 (red) and DAPI nuclear stain (blue). White arrows indicate transduced cells, whereas yellow arrows indicate non-transduced cells. **(b)** Flattened confocal stack images taken from the CA1 region of the hippocampus (top) and from the liver (mice were injected intravenously with  $1 \times 10^{13}$  vg/mouse) using the same confocal settings. Arrows indicate nuclei with a high level of vector-derived MeCP2 expression (based on fluorescence intensity of the anti-Myc antibody) and arrowheads indicate nuclei with low expression levels. Scale bar in (a) & (b) = 20  $\mu$ m. **(c)** measurement of the integrated pixel intensity per nucleus in liver (55 transduced cells and CA1 (131 transduced cells) of the same mice (n = 3 mice). Data presented as mean  $\pm$  SEM.

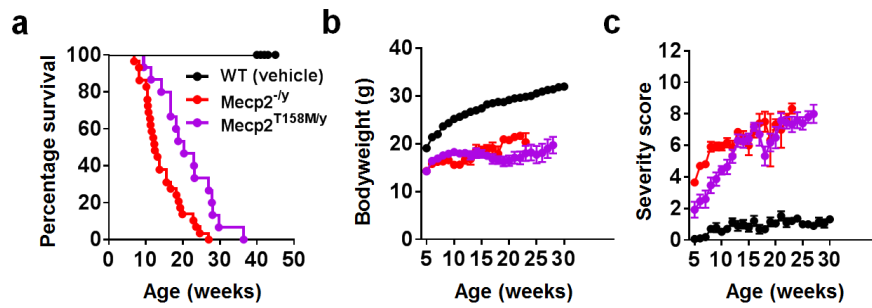

**Figure S5. Comparison of *Mecp2*<sup>T158M/y</sup> and *Mecp2*<sup>-/y</sup> mice.**

**(a)** Survival plot for *Mecp2*<sup>T158M/y</sup> mice (n=15) and *Mecp2*<sup>-/y</sup> mice (n=29). **(b-c)** Plots showing no significant differences in mean bodyweight and aggregate severity score, respectively, between *Mecp2*<sup>T158M/y</sup> and *Mecp2*<sup>-/y</sup> mice. Data presented as mean ± SEM.

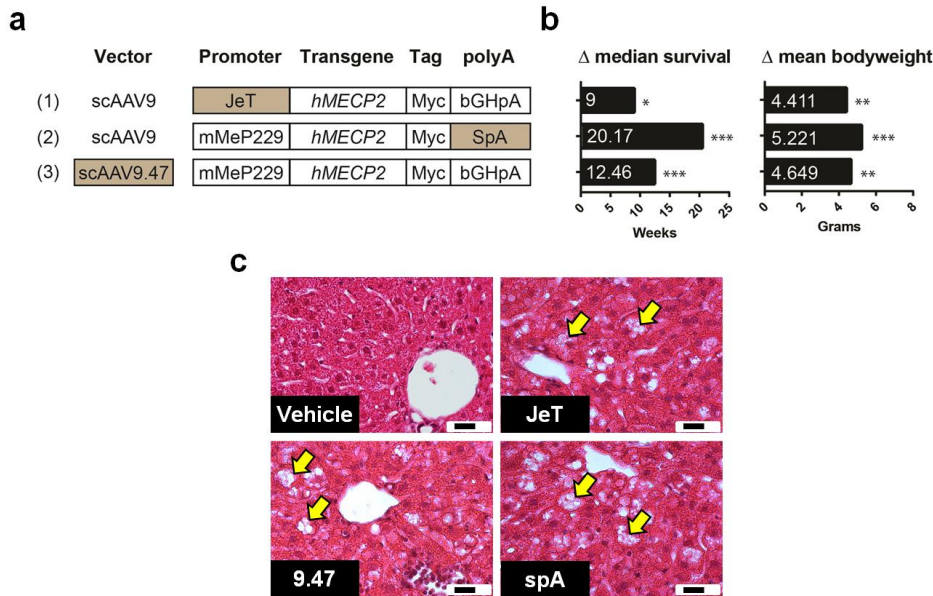

**Figure S6. Novel vector design features, efficacy and liver phenotype.**

**(a)** A summary of the design differences for three of the novel vectors described in the text. **(b)** Efficacy of these three novel vectors after intravenous injection of  $1 \times 10^{12}$  vg/mouse to 4-5 weeks old *Mecp2<sup>-y</sup>* mice, expressed as increase in median survival relative to the vehicle controls (left; compared using Mantel-Cox test) and mean bodyweight at the age of 11 weeks (right) relative to the vehicle controls (one-way ANOVA with Tukey's post-hoc pairwise comparisons). \*  $p < 0.05$ , \*\*  $p < 0.01$ , \*\*\*  $p < 0.001$ . **(c)** Representative H&E-stained liver sections from mice injected with JeT, 9.47 or spA vectors. Arrows indicate vacuolation of hepatocytes; scale bar indicates 20  $\mu$ m.

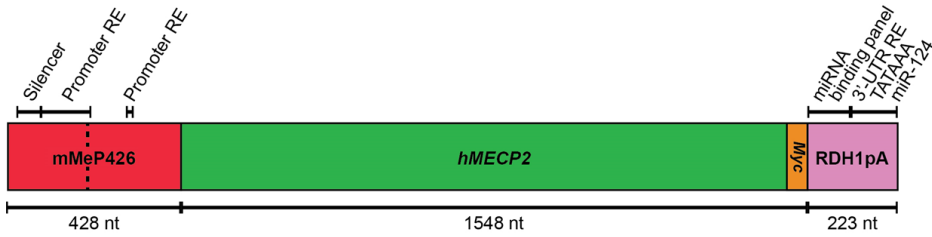

| Regulatory element (RE)       | Reference                                                            |
|-------------------------------|----------------------------------------------------------------------|
| Silencer                      | Liu & Francke (2006)*                                                |
| Promoter RE                   | Adachi et al. (2005); Liu & Francke (2006)*; Liyanage et al. (2013)  |
| miR-22 binding site           | Feng et al. (2014)                                                   |
| miR-19 binding site           | Jovicic et al. (2013)                                                |
| miR-132 binding site          | Klein et al. (2007)                                                  |
| 3'-UTR RE                     | Coy et al. (1999); Newnham et al. (2010)*; Bagga & D'Antonio (2013)* |
| TATAAA polyadenylation signal | Coy et al. (1999); Newnham et al. (2010)*; Bagga & D'Antonio (2013)* |
| miR-124 binding site          | Visvanathan et al. (2007); Jovicic et al. (2013)                     |

### Figure S7. Design of the 2<sup>nd</sup> generation vector construct.

Putative regulatory elements (RE) in the extended mMeP426 promoter and endogenous distal 3'-UTR are indicated. The extent of the mMeP229 promoter (used in the 1<sup>st</sup> generation vector) is indicated by the dashed line. Two non-endogenous cytosine nucleotides precede the ATG start codon. The RDH1pA 3'-UTR consists of several exogenous microRNA (miR) binding sites incorporated as a 'binding panel' adjacent to a portion of the distal endogenous *MECP2* polyadenylation signal and its accompanying regulatory elements. References with an asterisk indicate human *in vitro* studies, not rodent.
